# Supplementary material for: Benzonitrile-based AIE polymer host with a simple synthesis process for high-efficiency solution-processable green and blue TADF organic light emitting diodes
Source: Royal Society of Chemistry journal article supplement (doi:10.1039/d1tc05010a), 2022-01-01
Supplement: d1tc05010a1.pdf [file d1tc05010a1.pdf]

## Supporting Information

### **Benzonitrile-based AIE polymer host with simple synthesis process for high-efficiency solution-processable green and blue TADF organic light emitting diodes**

Tao Zhou<sup>a</sup>, Kaizhi Zhang<sup>a</sup>, Qingpeng Cao<sup>a</sup>, Hui Xu<sup>a</sup>, Xinxin Ban<sup>\*a,c</sup>, Peng Zhu<sup>a</sup>, Linxing Shi<sup>\*b</sup>,  
Fengjie Ge<sup>a</sup>, Wei Jiang<sup>\*c</sup>

<sup>a</sup> School of Environmental and Chemical Engineering, Jiangsu Key Laboratory of Function Control Technology for Advanced Materials, Jiangsu Ocean University, Lianyungang, Jiangsu, 222005, P.R. China

<sup>b</sup> School of Science, Jiangsu Ocean University, Lianyungang, Jiangsu, 222005, China

<sup>c</sup> School of Chemistry and Chemical Engineering, Southeast University, Nanjing, Jiangsu, 211189, China

\*Corresponding Authors Email: [banxx@jou.edu.cn](mailto:banxx@jou.edu.cn); [shilinxing@jou.edu.cn](mailto:shilinxing@jou.edu.cn); [jiangw@seu.edu.cn](mailto:jiangw@seu.edu.cn).

#### **General method**

The <sup>1</sup>H were recorded on the BRUKER AMX instrument. The optimized structure was calculated by Gaussian09 at the B3LYP functional with 6-31G basis sets. Use Netzsch simultaneous thermal analyzer (STA) system (STA 409PC) and DSC 2910 Modulation Calorimeter to record thermogravimetric analysis (TGA) and differential scanning calorimetry (DSC) curves at a heating rate of 10°C min<sup>-1</sup>. The UV-Vis absorption spectrum of the compound was measured by SHIMADZU UV-2450. The photoluminescence emission spectra were recorded with HORIBA FLUOROMAX-4. The PL quantum efficiency was measured with an integrating sphere at an excitation wavelength of 330 nm. Cyclic voltammetry (CV) is performed on the CHI750C voltammetry analyzer in a typical three-electrode cell, which has a platinum plate working electrode, a platinum wire counter electrode and a silver wire reference electrode.

#### **Device manufacturing and measurement**

The glass substrate with ITO coating were rinsed in deionized water, sonicated in acetone, ethanol and isopropanol in sequence. Before device fabrication, the ITO substrate was treated in a UV-

ozone oven for 20 minutes. Then PEDOT:PSS was spin-coated on the ITO substrate and dried at 150°C for 10 minutes. Then put the substrate in a nitrogen glove box, spin-coated the emission layer on the PEDOT:PSS layer, and annealed at 80°C for 15 minutes. After that, TPBi was vacuum deposited as the electron transport layer, and Cs<sub>2</sub>CO<sub>3</sub> and Al were vacuum deposited as the cathode. EL spectra, device brightness and current density-voltage characteristics are recorded using a combination of Photo-Research PR-655 SpectraScan and Keithley 2400 Sourcemeter. The device is tested under atmospheric conditions without a protective package.

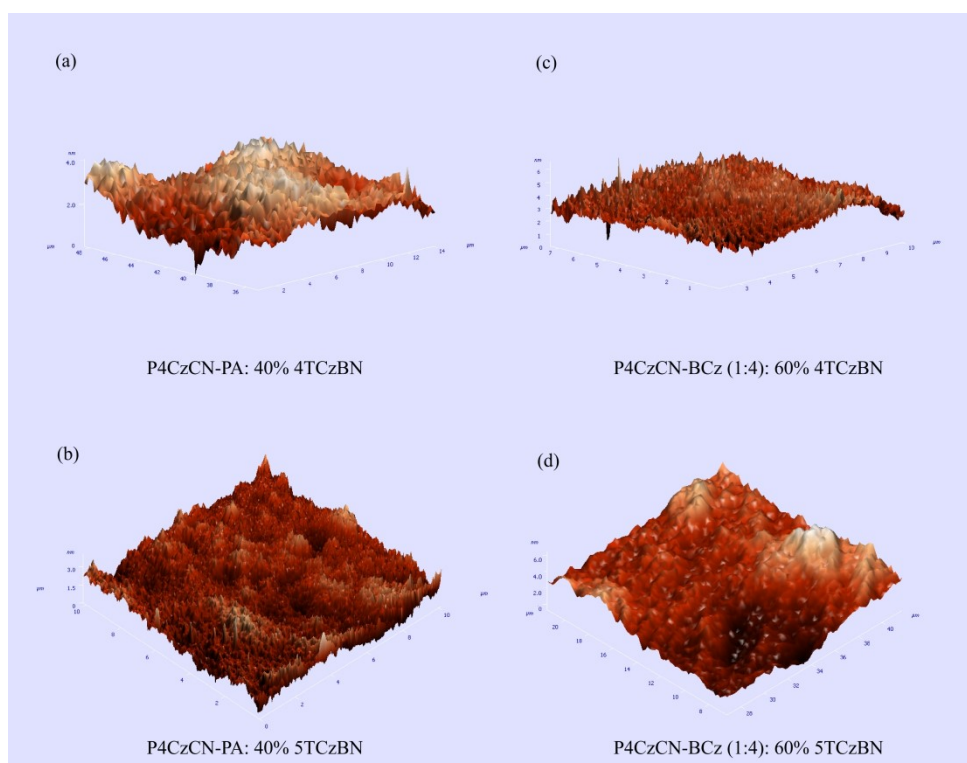

**Figure S1.** AFM topographic images of P4CzCN-PA: 40% 4TCzBN (a), P4CzCN-PA: 40% 5TCzBN (b), P4CzCN-BCz (1:4): 60% 4TCzBN (c) and P4CzCN-BCz (1:4): 60% 5TCzBN (d).

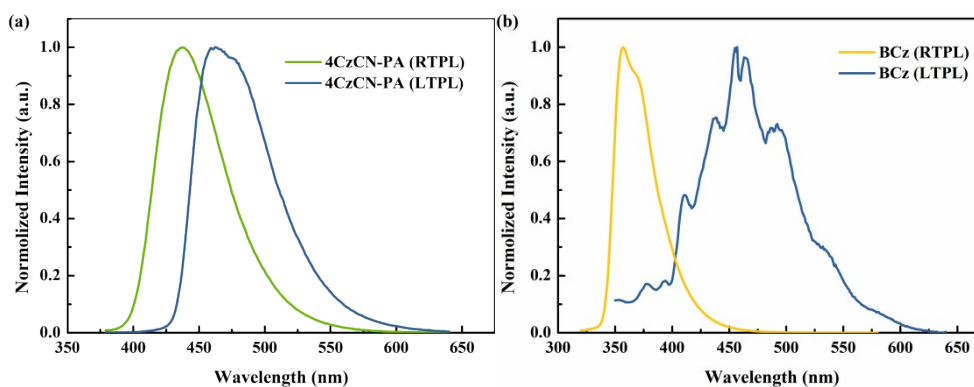

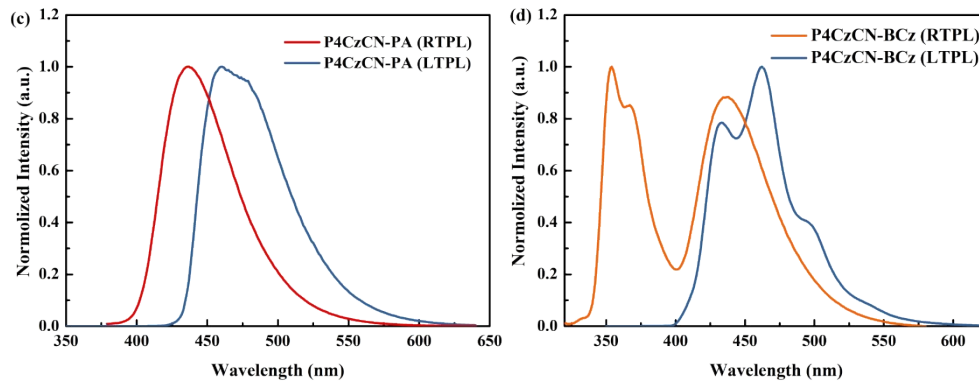

**Figure S2.** Fluorescence (measured at room temperature) and phosphorescence spectra (measured at 77K) in toluene solution of 4CzCN-PA (a), BCz (b), P4CzCN-PA (c) and P4CzCN-BCz (1:4) (d).

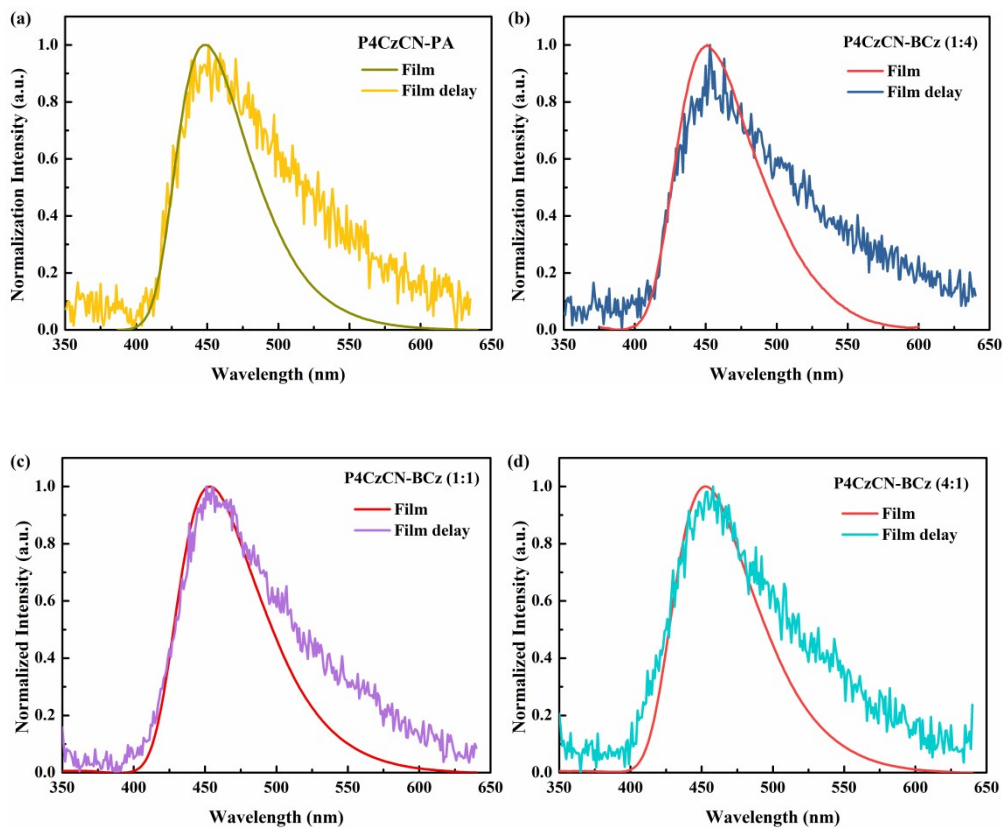

**Figure S3.** Fluorescence and delay Fluorescence spectra of P4CzCN-PA (a), P4CzCN-BCz (1:4) (b), P4CzCN-BCz (1:1) (c) and P4CzCN-BCz (4:1) (d) at room temperature

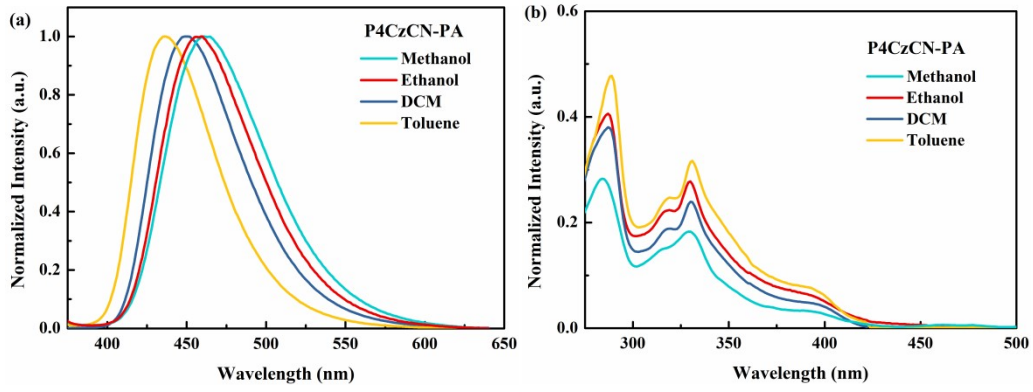

Figure S4. PL and UV spectra of P4CzCN-PA in different solvents.

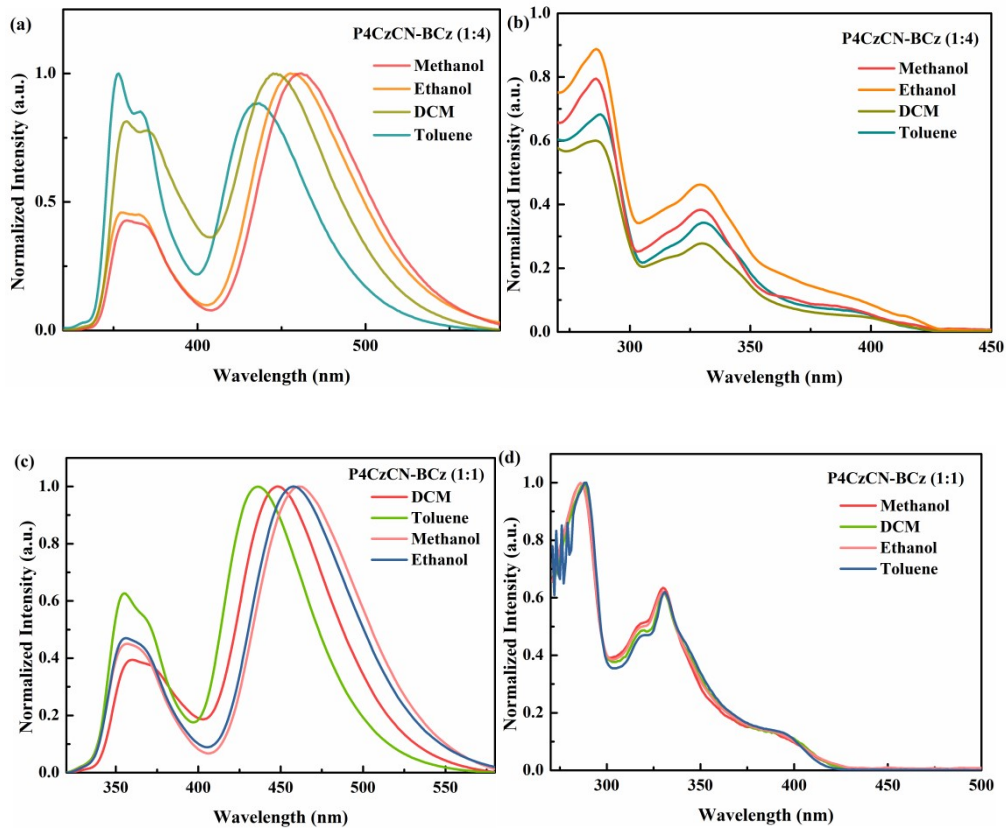

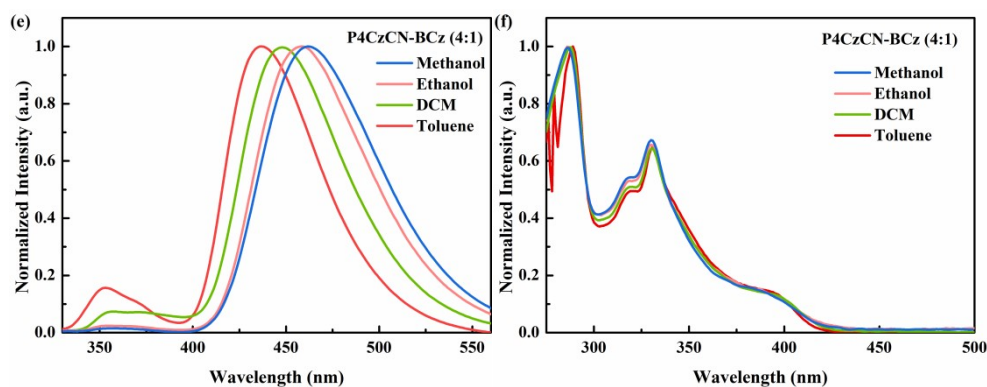

**Figure S5.** PL and UV spectra of P4CzCN-BCz (1:4) (a,b), P4CzCN-BCz (1:1) (c,d) and P4CzCN-BCz (4:1) (e,f) in different solvents.

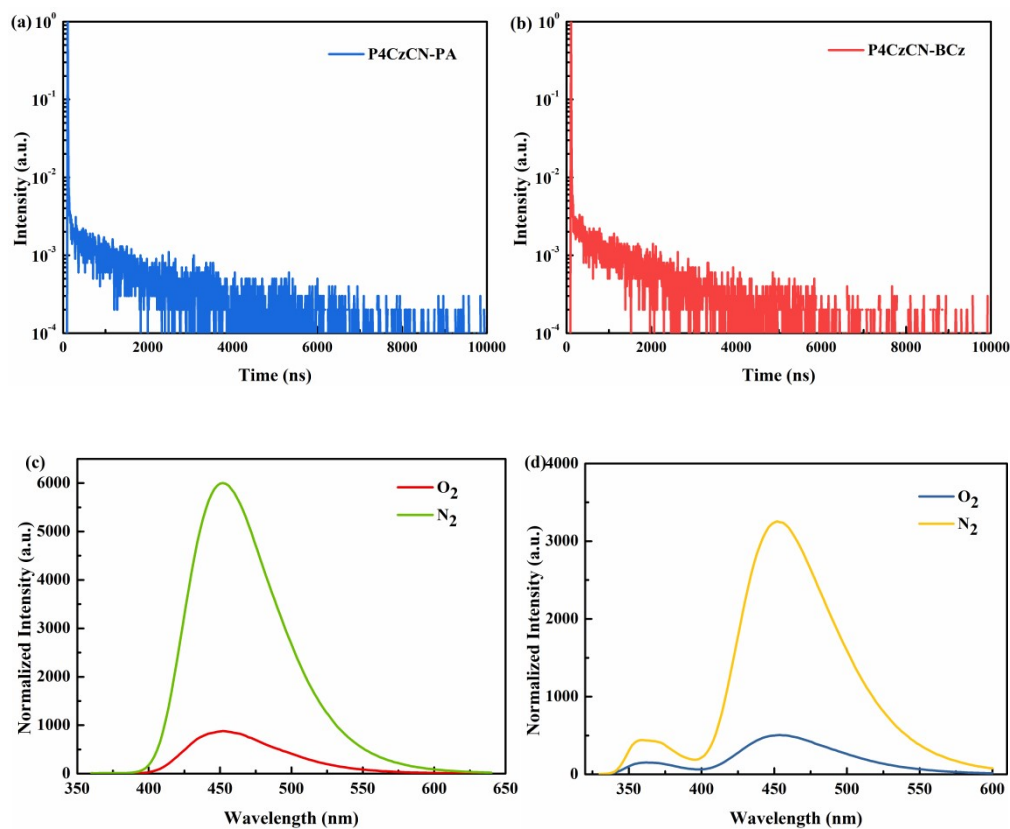

**Figure S6.** Transient photoluminescence decay curves of P4CzCN-PA (a), P4CzCN-BCz (b) and fluorescence spectra of P4CzCN-PA (c), P4CzCN-BCz (d) in O<sub>2</sub>/N<sub>2</sub>.

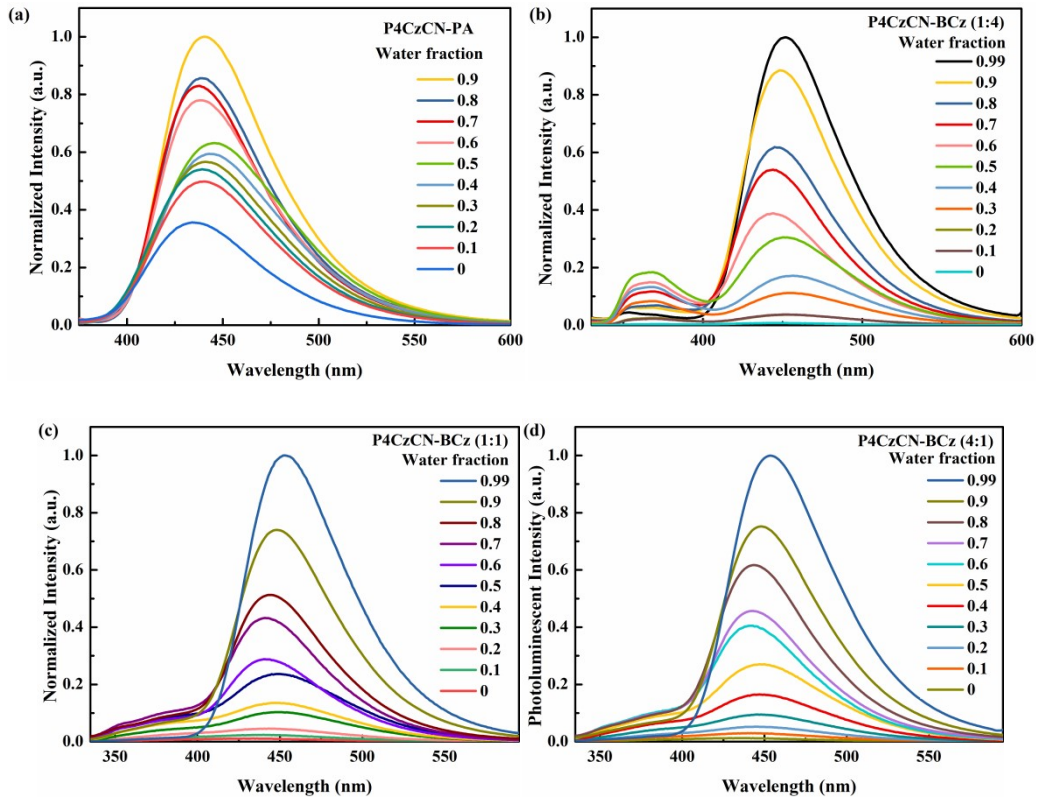

**Figure S7.** PL spectra of P4CzCN-PA (a), P4CzCN-BCz (1:4) (b), P4CzCN-BCz (1:1) (c), and P4CzCN-BCz (4:1) (d) in mixed solvents with different volume ratios of acetone and water.

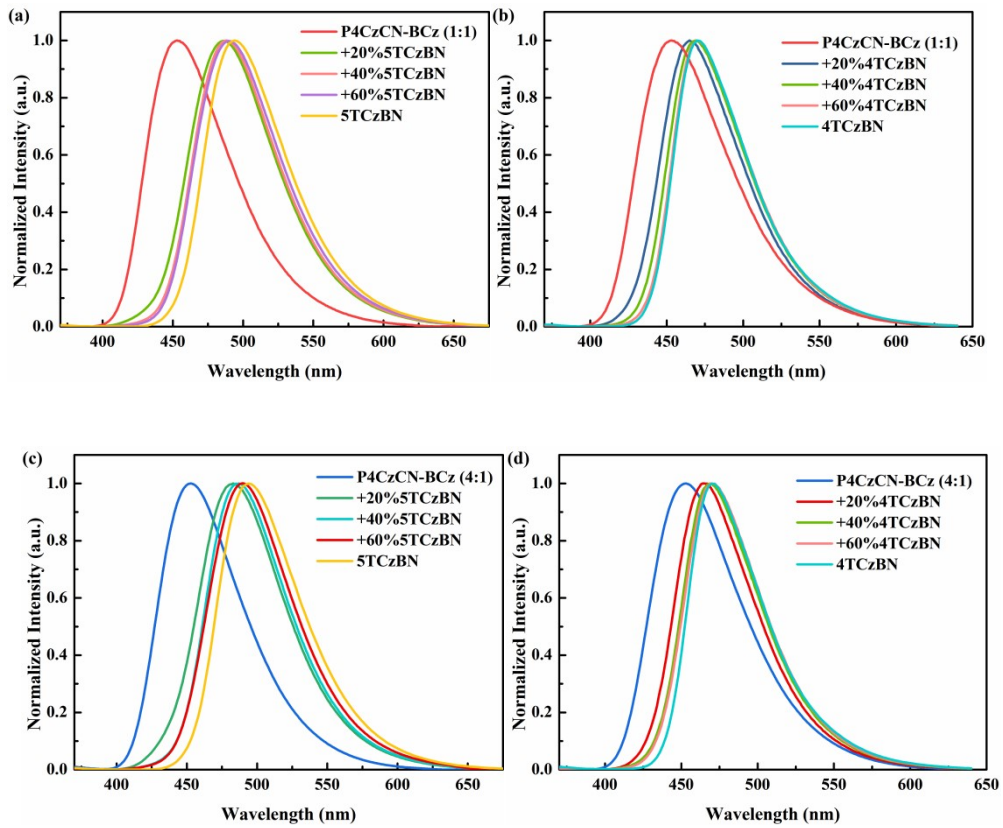

**Figure S8** PL spectra of P4CzCN-BCz(1:1) (a,b) and P4CzCN-BCz(4:1) (c,d) films at different guest materials and doping concentration.

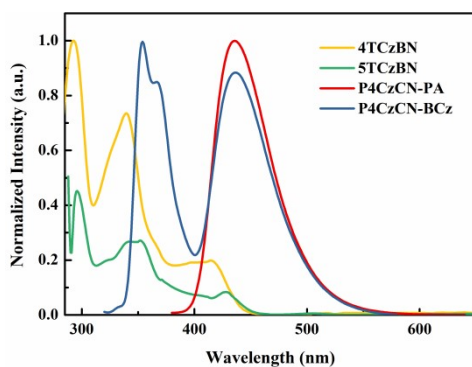

**Figure S9** UV-vis absorption of 5TCzBN, 4TCzBN and PL emission of P4CzCN-PA, P4CzCN-BCz (1:4) in toluene solution.

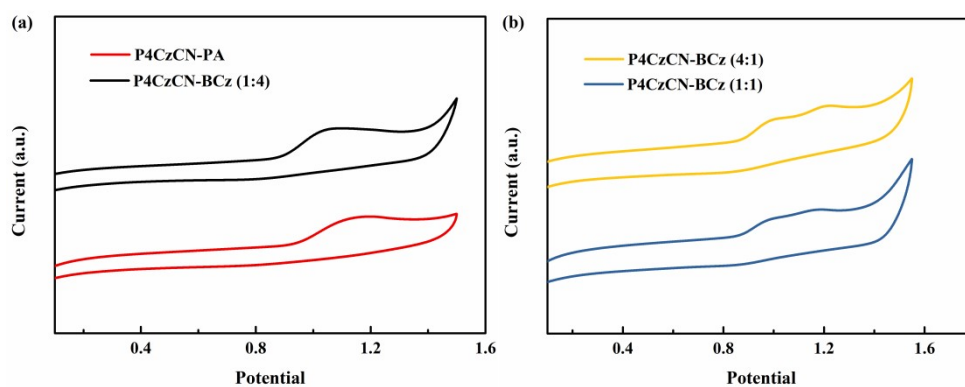

**Figure S10.** Cyclic voltammetry (CV) curves of P4CzCN-PA, P4CzCN-BCz(1:4) (a) and P4CzCN-BCz(1:1), P4CzCN-BCz(4:1) (b) measured at room temperature in  $\text{CH}_2\text{Cl}_2$ .

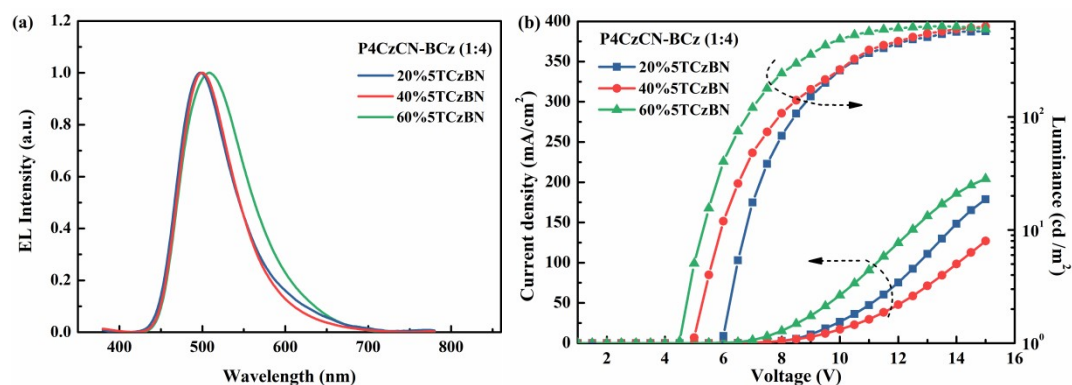

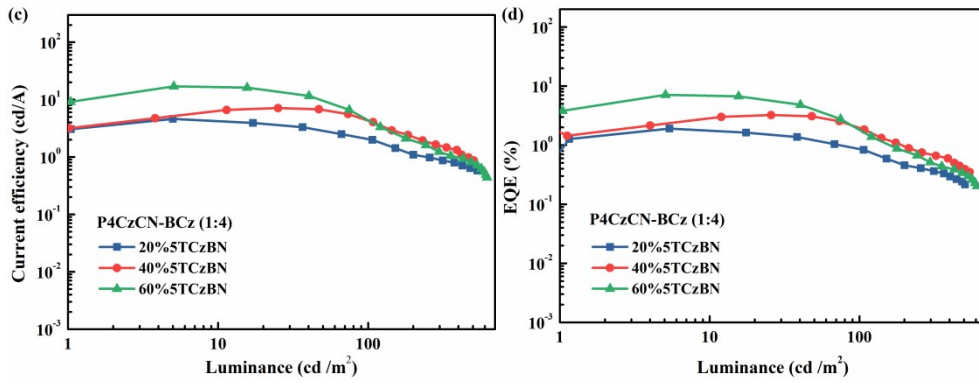

**Figure S11** (a) The electroluminescence spectra, (b) current density-voltage-luminance (J-V-L) curves, (c) the curves of current efficiency (CE) versus luminance, (d) the curves of external quantum efficiency (EQE) versus luminance.

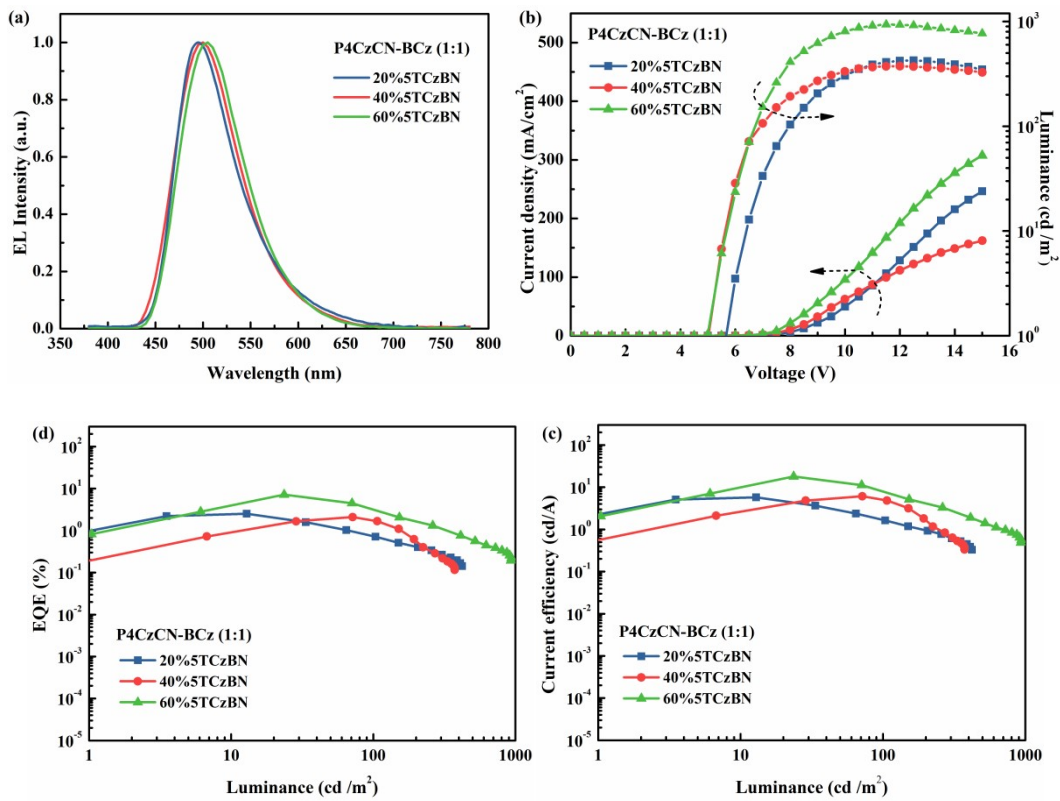

**Figure S12** (a) The electroluminescence spectra, (b) current density-voltage-luminance (J-V-L) curves, (c) the curves of current efficiency (CE) versus luminance, (d) the curves of external quantum efficiency (EQE) versus luminance.



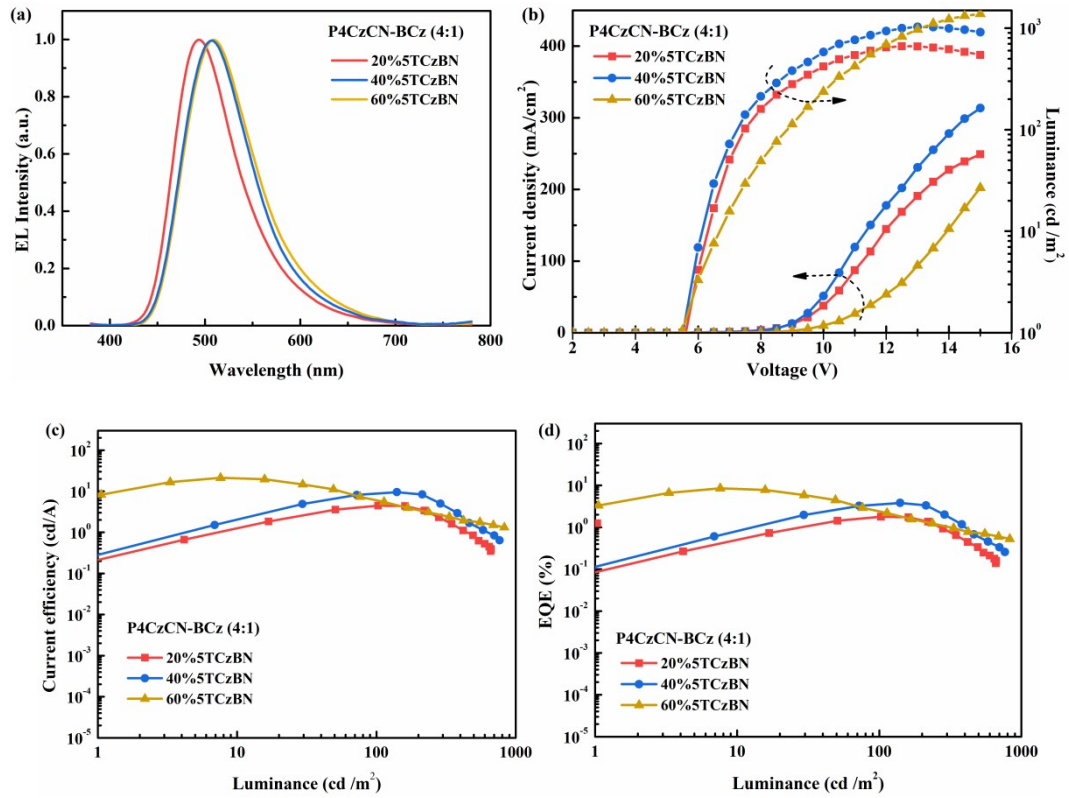

**Figure S13** (a) The electroluminescence spectra, (b) current density-voltage-luminance (J-V-L) curves, (c) the curves of current efficiency (CE) versus luminance, (d) the curves of external quantum efficiency (EQE) versus luminance.

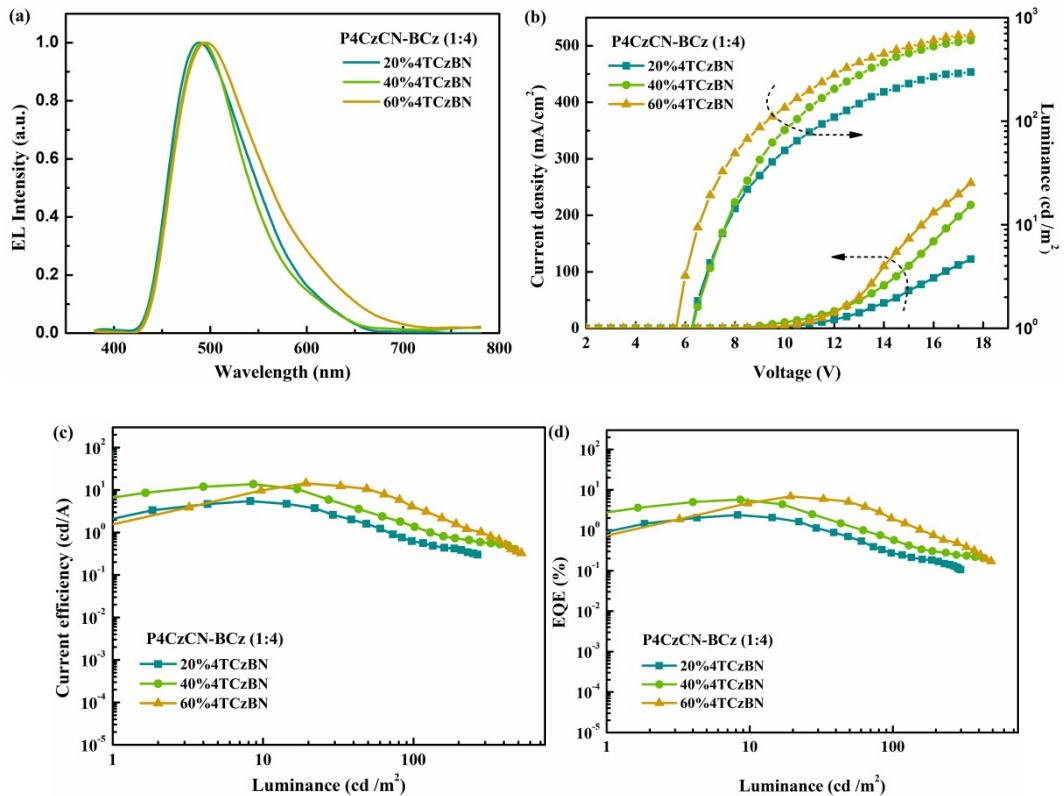

**Figure S14** (a) The electroluminescence spectra, (b) current density-voltage-luminance (J-V-L) curves, (c) the curves of current efficiency (CE) versus luminance, (d) the curves of external quantum efficiency (EQE) versus luminance.

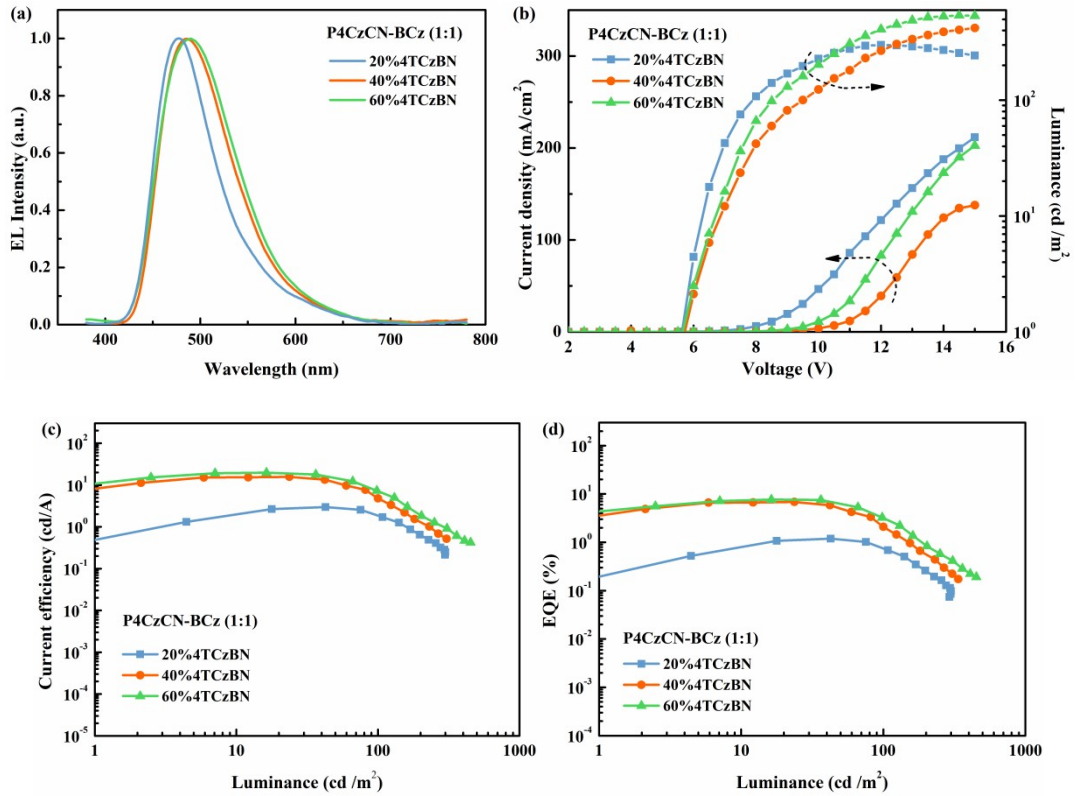

**Figure S15** (a) The electroluminescence spectra, (b) current density-voltage-luminance (J-V-L) curves, (c) the curves of current efficiency (CE) versus luminance, (d) the curves of external quantum efficiency (EQE) versus luminance.

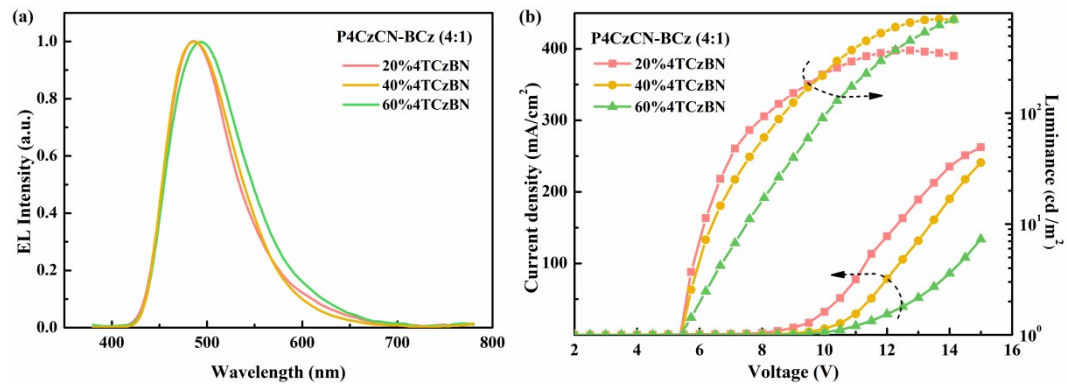

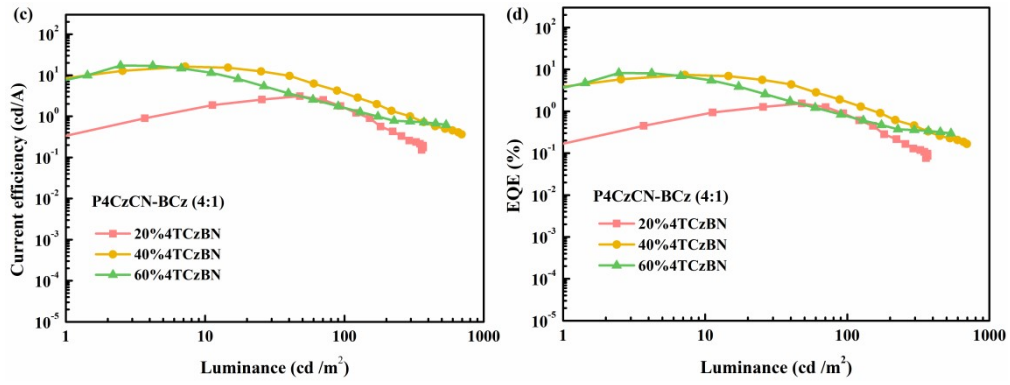

**Figure S16** (a) The electroluminescence spectra, (b) current density-voltage-luminance (J-V-L) curves, (c) the curves of current efficiency (CE) versus luminance, (d) the curves of external quantum efficiency (EQE) versus luminance.

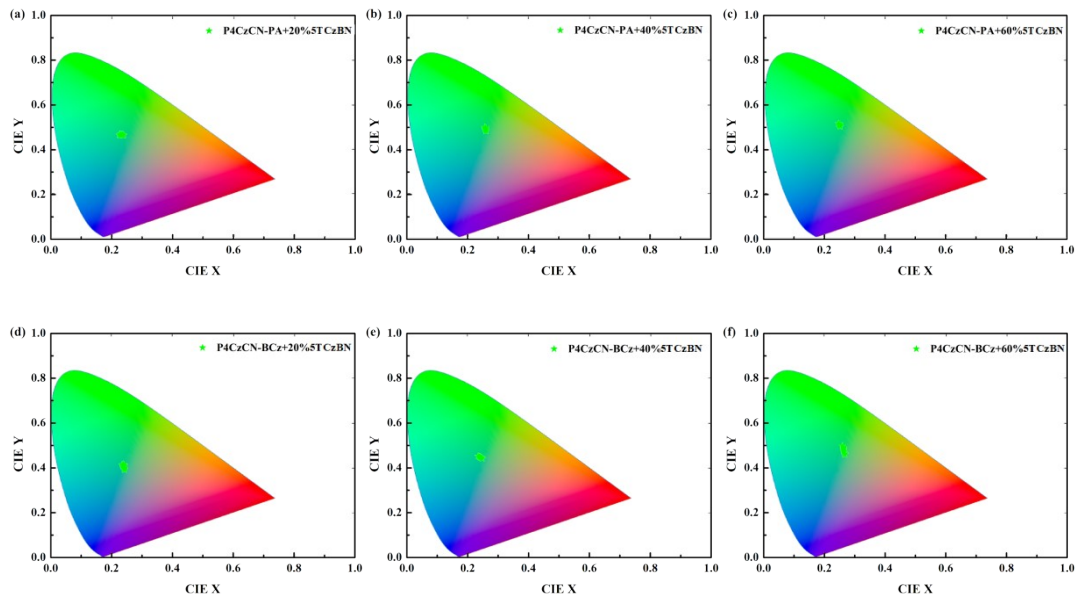

**Figure S17** The green CIE of P4CzCN-PA and P4CzCN-BCz (1:4) in different doping concentration.

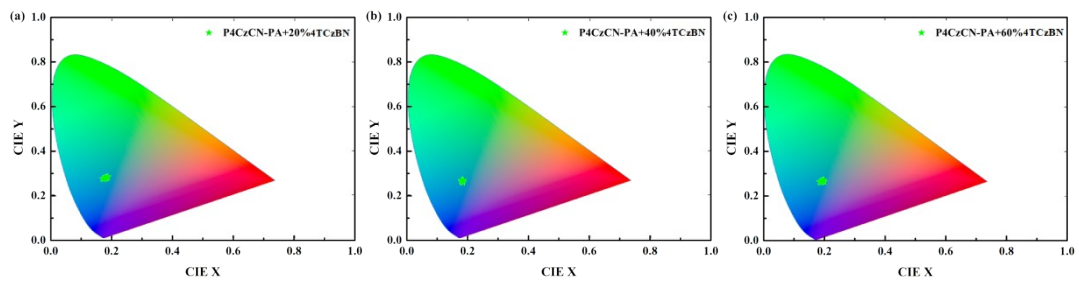

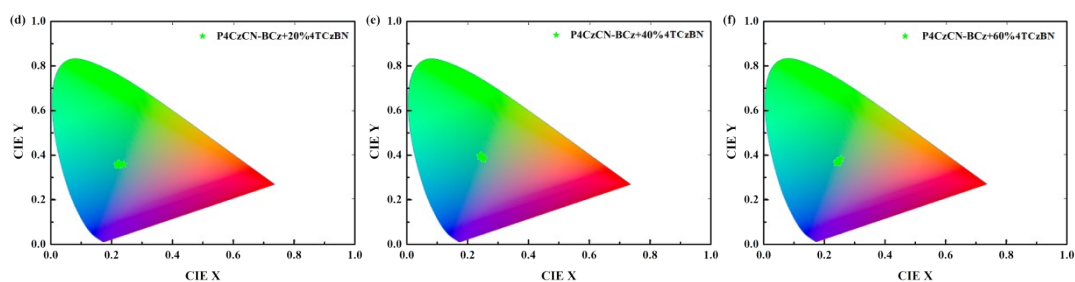

**Figure S18** The blue CIE of P4CzCN-PA and P4CzCN-BCz (1:4) in different doping concentration.

**Table S1.** Device performance data of solution-processed TADF-OLEDs

| host                | gust   | Dopant conc.<br>(wt.%) | EL peak<br>[nm] | $V_{on}^a$<br>[V] | $CE_{max}^b$<br>[cd A <sup>-1</sup> ] | $PE_{max}^c$<br>[lm W <sup>-1</sup> ] | $EQE_{max}^d$ | CIE [x,y] <sup>e</sup> |
|---------------------|--------|------------------------|-----------------|-------------------|---------------------------------------|---------------------------------------|---------------|------------------------|
| P4CzCN-BCz<br>(1:4) | 5tCzCN | 20                     | 498             | 6                 | 4.6                                   | 2.2                                   | 1.9           | (0.24, 0.40)           |
|                     |        | 40                     | 500             | 5                 | 6.8                                   | 3.6                                   | 3.2           | (0.25, 0.45)           |
|                     |        | 60                     | 508             | 4.5               | 17.0                                  | 9.7                                   | 7.1           | (0.27, 0.49)           |
|                     | 4tCzCN | 20                     | 488             | 6.4               | 4.7                                   | 2.3                                   | 2.4           | (0.23, 0.36)           |
|                     |        | 40                     | 492             | 6.3               | 13.7                                  | 5.7                                   | 5.7           | (0.24, 0.38)           |
|                     |        | 60                     | 495             | 5.8               | 14.4                                  | 6.5                                   | 6.9           | (0.25, 0.37)           |
| P4CzCN-BCz<br>(1:1) | 5tCzCN | 20                     | 495             | 5.8               | 5.8                                   | 2.8                                   | 2.5           | (0.24, 0.39)           |
|                     |        | 40                     | 500             | 5.1               | 6.1                                   | 2.9                                   | 2.1           | (0.25, 0.40)           |
|                     |        | 60                     | 504             | 5                 | 17.9                                  | 9.4                                   | 7.2           | (0.25, 0.43)           |
|                     | 4tCzCN | 20                     | 477             | 5.7               | 3.0                                   | 1.3                                   | 1.2           | (0.21, 0.26)           |
|                     |        | 40                     | 485             | 5.8               | 15.7                                  | 7.3                                   | 6.8           | (0.24, 0.38)           |
|                     |        | 60                     | 490             | 5.7               | 19.8                                  | 7.6                                   | 7.6           | (0.24, 0.39)           |

<sup>a</sup>Turn on voltage at luminance of 1 cd m<sup>-2</sup>. <sup>b</sup>Maximum current efficiency. <sup>c</sup>Maximum power efficiency.

<sup>d</sup>Maximum external quantum efficiency. <sup>e</sup>CIE = the Commission Internationale de L'Eclairage coordinates

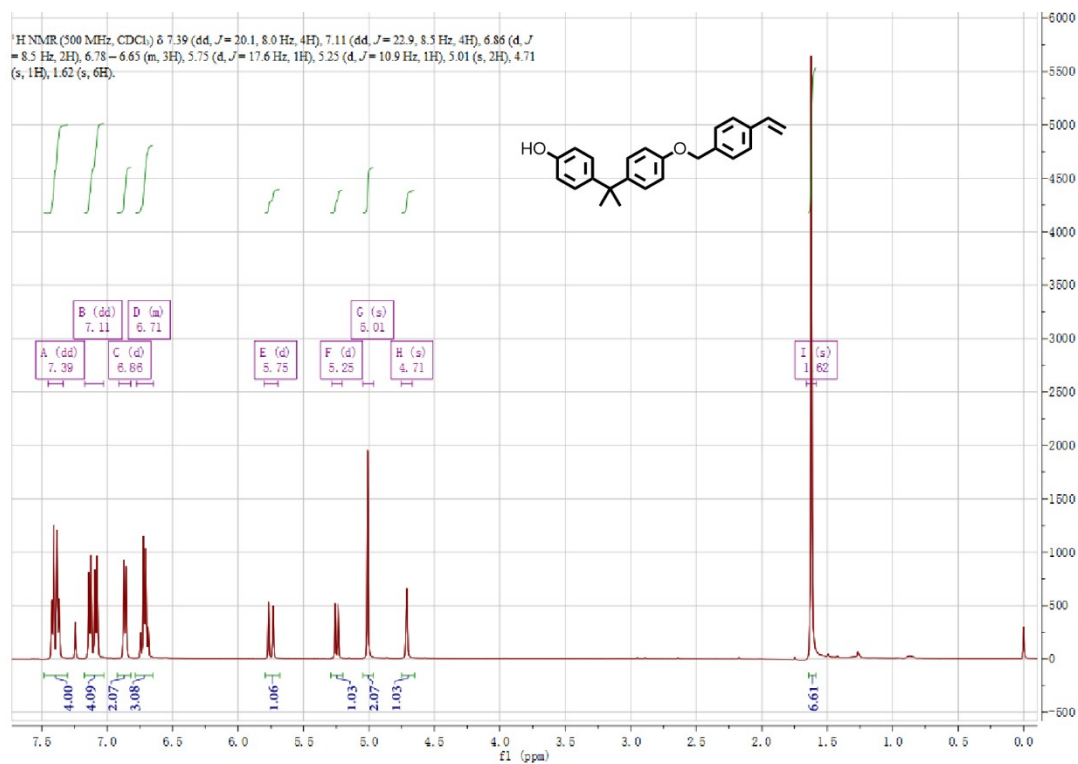

**Figure S19.** <sup>1</sup>H NMR spectra of 4-(2-(4-((4-vinylbenzyl)oxy)phenyl)propan-2-yl)phenol.

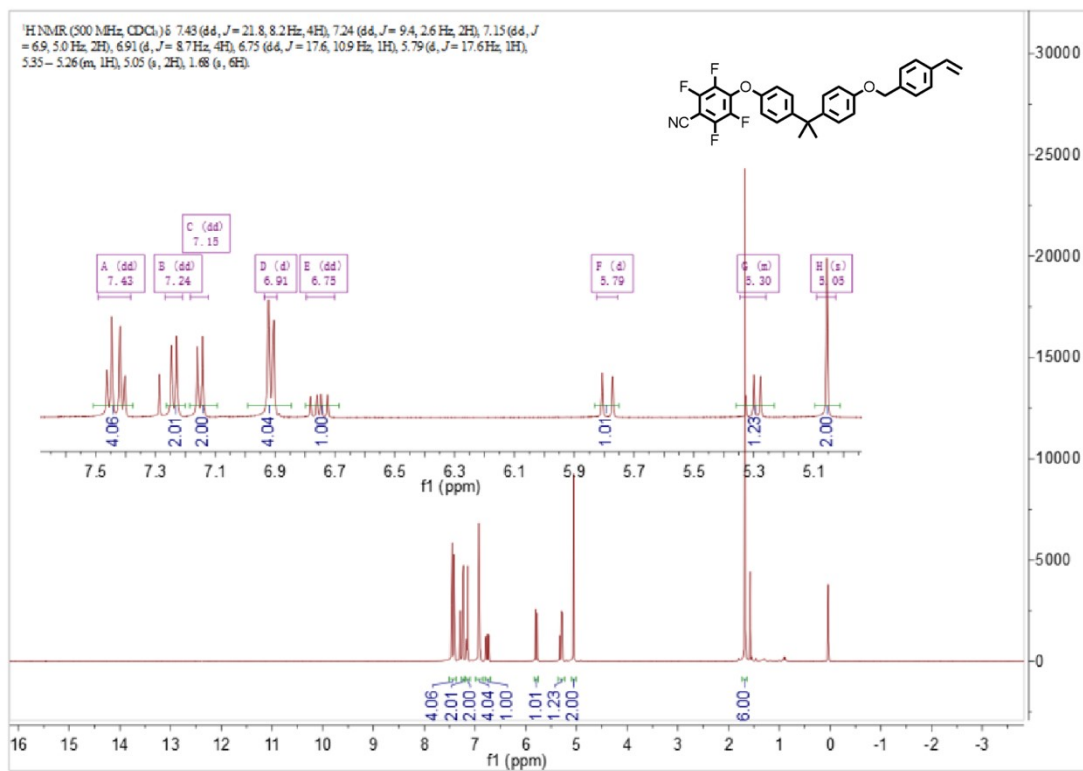

**Figure S20.** <sup>1</sup>H NMR spectra of 4FCN-PA.

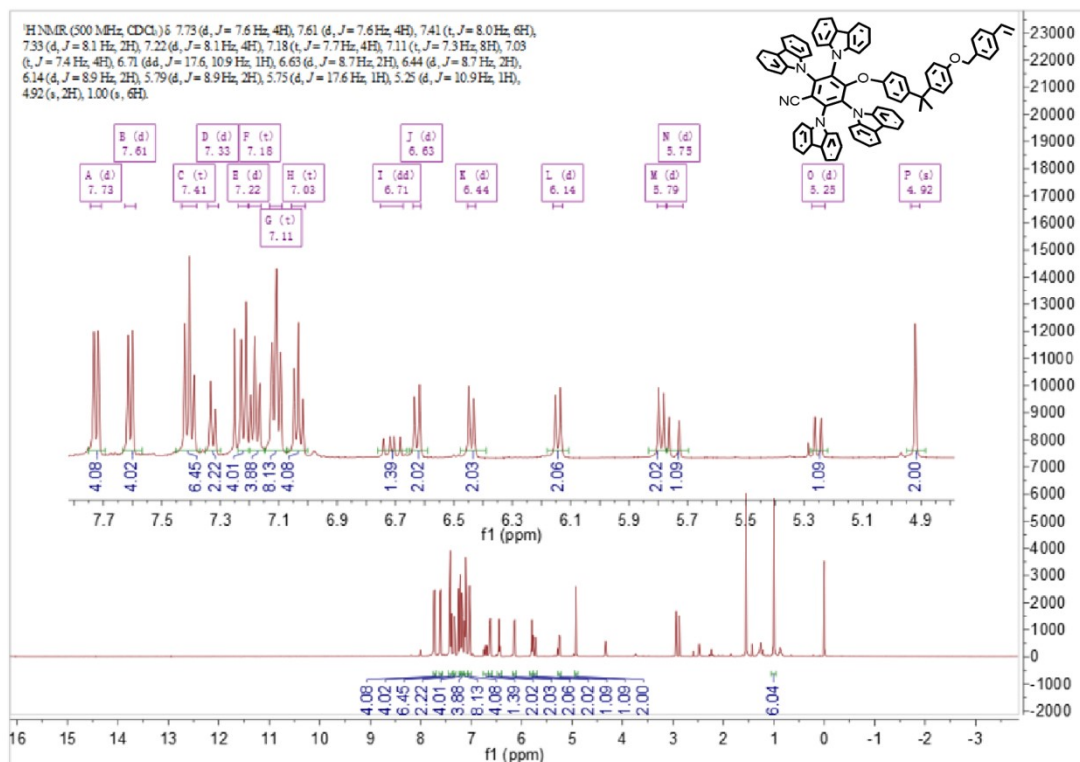

Figure S21. <sup>1</sup>H NMR spectra of M1.

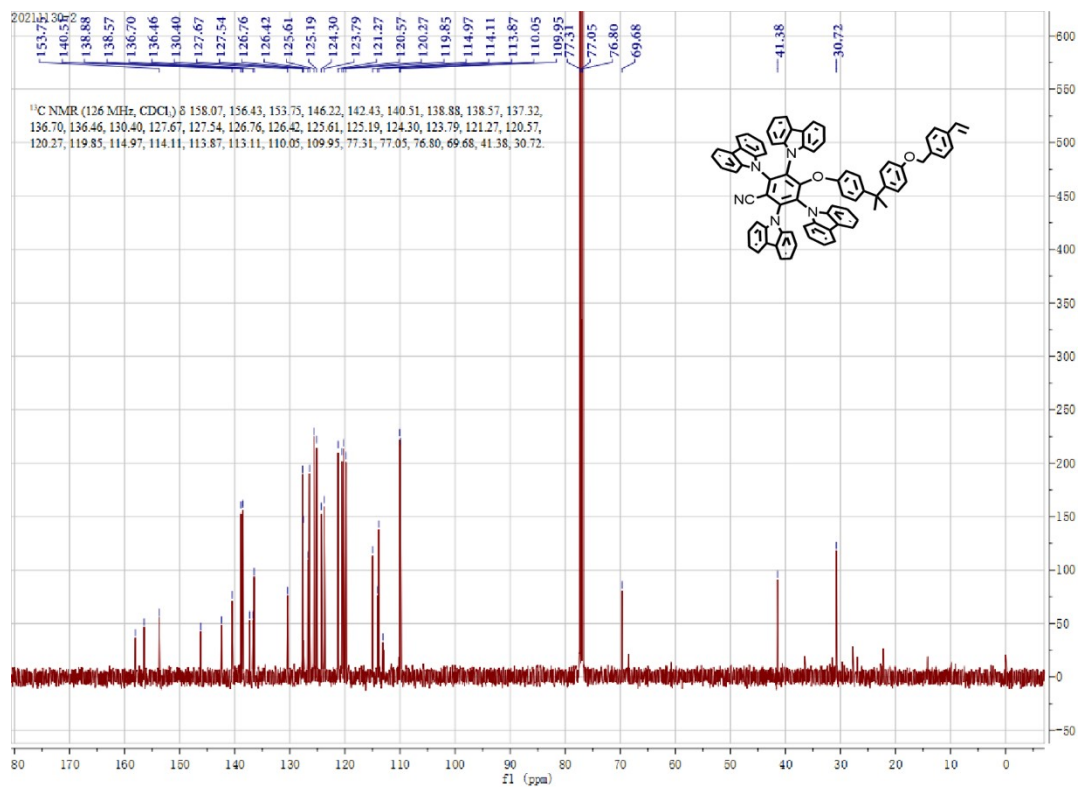

Figure S22. <sup>13</sup>C NMR spectra of M1.

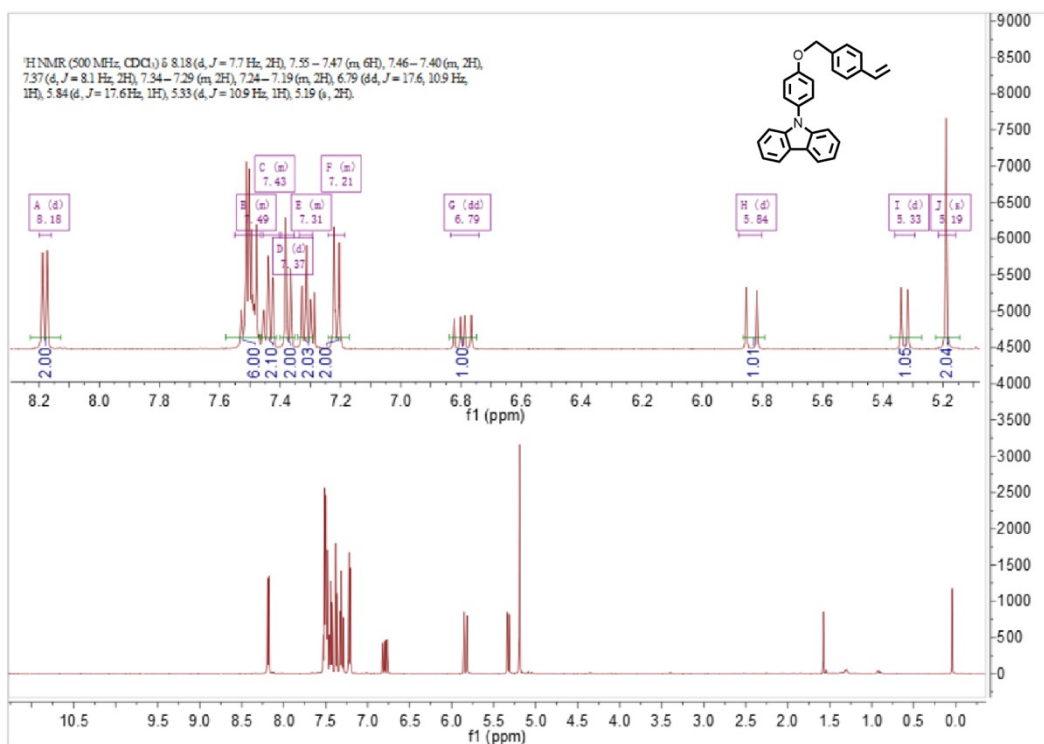

Figure S23. <sup>1</sup>H NMR spectra of M2.

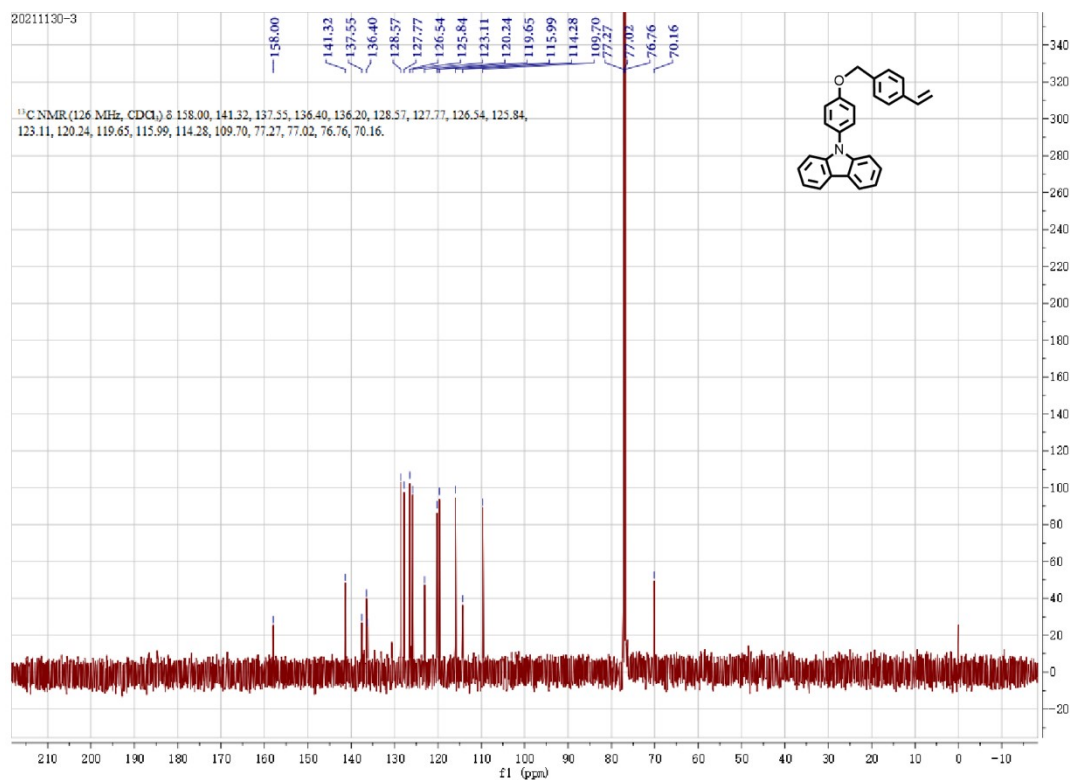

**Figure S24.**  $^{13}\text{C}$  NMR spectra of M2.
